# Supplementary material for: Using the Aesop's Fable Paradigm to Investigate Causal Understanding of Water Displacement by New Caledonian Crows
Source: PLoS One. 2014 Mar 26;9(3):e92895. doi: 10.1371/journal.pone.0092895 (PMC3966847; doi:10.1371/journal.pone.0092895)
Supplement: Data S1 — A trial-by-trial record of the choices made by each bird, for all six experiments. (XLSX) [file pone.0092895.s001.xlsx]

## Sheet: Trial-by-Trial Performance
	Experiment 1: Sand vs. Water
			stone drops												stone drops												stone drops												stone drops
			1	2	3	4	5	6	7	8					1	2	3	4	5	6	7						1	2	3	4	5								1	2	3	4	5	6	7	8
	Trial number	1	S	S	W	W	W	W	W	W				1	W	W	W									1	W	W	W	W	W							1	S	S	W
		2	W	W	S	S	S	S	S					2	W	S	S	W	W	W						2	S	S	S	S	W							2	S	S	W	W	W	W
		3	W	W	W	W	W							3	W	W	W									3	W	W										3	S	W	W
		4	W	W	W	W								4	S	S	W	W	W	S	W					4	S	S	S	W	W							4	W	W
		5	W	W	W	W								5	S	S	W									5	S	W	W	W	W							5	W	W	W	W
		6	W	W	W									6	W	W										6	W	W	W									6	W	W
		7	W	W										7	S	S	W									7	W	W	W	W								7	S	S	S	S	W	W	W	W
		8	W	W	W									8	W	W	W									8	S	W	W									8	W	W	W
		9	W	W	W	W	W	W	W					9	W	W	W	W								9	S	W	W	W								9	S	S	S	W	W	W	W	W
		10	W	S	W									10	W	W										10	W	W	W	W								10	W	W	W	W
		11	W	W	W	W	W	W						11	W	W	W									11	S	W	W	W								11	S	S	S	S	W	W	W
		12	W	W										12	W	W	W									12	W	W	W									12	W	W	W	W
		13	W	W	W									13	S	S	W	W								13	W	W	W	W								13	W	W	W
		14	S	S	S	W	W	W	W					14	W	W	W									14	S	S	W	W	W							14	W	W	W	W
		15	S	S	W	W	W							15	S	S	S	W	W							15	W	W	W									15	W	W	W
		16	W	W	W									16	W	W	W	W	W							16	W	W	W									16	W	W	W	W
		17	S	W	W									17	S	S	S	S	W	W	W					17	S	W	W	W	W							17	W	W
		18	W	W	W									18	W	W	W									18	W	W	W									18	W	W	W	W	W
		19	W	W	W	W								19	W	W	W									19	W	W	W	W	W							19	W	W
		20	W	S	W									20	W	W	W									20	W	W										20	S	S	S	W	W	W
		Bird:	Orange												Red-Blue												White												Yellow
	Experiment 2: Light vs. Heavy
			stone drops												stone drops												stone drops												stone drops
			1	2	3	4	5	6	7	8	9				1	2	3	4	5	6							1	2	3	4									1	2	3	4
	Trial number	1	L	L	H	H	L	H						1	H	H	L	H	H	L						1	H	H										1	H	L
		2	L	H	L	L	L	L	L	H	H			2	H											2	H											2	H	L	L	H
		3	H	H	L	L								3	H											3	H	L	H									3	H	H
		4	H	L	H	L	H							4	H	H	H	H	H							4	H	L	H									4	H	H	H
		5	H	L	H	H								5	H	H	H									5	H	H	H									5	H	H	H
		6	H	H	H									6	H	H										6	H	H										6	H	H	H	H
		7	H	H	H	H								7	H	H										7	H	H										7	H	H	H
		8	H	H	L									8	H											8	H	H	H	H								8	H	H	H
		9	H	H										9	H	H	H									9	H	H										9	H	H	H	H
		10	H	H										10	H	H										10	H	H	H	H								10	H	H
		11	H	H										11	H	H										11	H	H										11	H	H	H
		12	H	H										12	H											12	H											12	H	H
		13	H	H	H									13	H	H										13	H	H										13	H	H
		14	H	H	L	L								14	H											14	H	H										14	H	H
		15	H	H										15	H	H										15	H	H										15	H
		16	H	H										16	H	H										16	H	H	H									16	H	H	L
		17	H	H	H									17	H	H										17	H	H										17	H	H	H	H
		18	H	H										18	H	H	H	H	H							18	H	H										18	H	H
		19	H	H	H									19	H	H	H									19	H	H										19	H	H
		20	H											20	H	L	H									20	H	H										20	H	H
		Bird:	Orange												Red-Blue												White												Yellow
	Experiment 3: Solid vs. Hollow
			stone drops												stone drops												stone drops												stone drops
			1	2	3	4									1	2	3										1	2	3	4	5	6							1	2	3	4
	Trial number	1	S	S										1	S	S										1	S	S										1	S	S	S
		2	S	S	S	S								2	S	S										2	S	S										2	S	S	S	S
		3	S	S										3	S	S	S									3	S											3	S	S
		4	S	S	S									4	S	S										4	S	S										4	S	S
		5	S	H	S	S								5	S	S	S									5	S											5	S	S
		6	H	S										6	S	S	S									6	H	S	H									6	S	S
		7	S	H	S									7	S	S										7	H	S	H									7	S	S
		8	S	S	H									8	S	S										8	H	S	S	H								8	S	S	S
		9	S	H	H	S								9	S	S										9	S											9	S	S
		10	S	H	S	S								10	S	S	S									10	S	H	H	H	S	S						10	S
		11	S	S	S									11	S	S										11	S											11	S	S
		12	S	S										12	S											12	S	H	S	S								12	S	S	S
		13	S	S										13	S	S										13	S	H	S									13	S	S
		14	S	S										14	S	S										14	S	S										14	S
		15	S	S										15	S	S										15	S	H										15	S	S
		16	S	S	S									16	S	S										16	S	H	H	S								16	S	S
		17	S	S										17	S	S	S									17	S	H	S									17	S	S
		18	S	S	S									18	S	S										18	S	S	S									18	S	S
		19	S	S										19	S	S										19	S	S										19	S	S
		20	S	H										20	S	S										20	S	S										20	S
		Bird:	Orange												Red-Blue												White												Yellow
	Experiment 4: Narrow vs. Wide
			stone drops												stone drops												stone drops												stone drops
			1	2	3	4	5	6	7	8	9				1	2	3	4	5	6	7	8	9	10			1	2	3	4	5	6	7	8	9	10			1	2	3	4	5	6	7	8	9	10
	Trial number	1	N	N										1	N	N										1	N											1	N	W	W	W	W	W	N	N
		2	N	N										2	W	W	W	W	W	W						2	N	N										2	W	W	W	W	W	W
		3	W	W	W	W	W	W	W	N	N			3	W	W	W	W	W	W	W	W				3	W	W	W	W	W	W						3	W	W	W	W	W	W	W
		4	N	N										4	N	N										4	W	W	W	W	W	W						4	N	N	N
		5	W	W	N	N	N							5	N	N										5	W	W	W	W								5	N	N
		6	N	N	N									6	W	W	W	W	W	W	W	W	W	W		6	N	N										6	N	N
		7	N	N										7	N	N										7	N	N										7	W	W	W	W	W	W	W	N	N	N
		8	W	W	W	W	W	W	W	W				8	W	W	N	N								8	N	N										8	N	N
		9	N	N										9	W	N	N									9	N	N										9	W	W	N	N
		10	N	N										10	N	N										10	W	W	W	W	W	W	W	W	W			10	N	N
		11	N	N	N									11	N	N										11	N											11	W	W	W	W	W	W
		12	N	N	N									12	W	W	W	N	N							12	W	W	W	W	W	W						12	N	N
		13	N	N	N									13	W	N	N									13	N	N										13	N	N
		14	N	N										14	N	N										14	N	N										14	N	N
		15	W	W	W	W	W	N	N					15	N	N	N									15	W	W	W	W	W	W						15	W	W	W	N	N
		16	W	W	W	W	W	W	W	W	W			16	W	W	N	N								16	N	N										16	N	N	N
		17	W	W	N	N								17	N	N										17	W	W	W	W	N	W	W	W	W	W		17	W	W	W	W	N	N
		18	W	W	W	W	W	W	W	W				18	W	N	N									18	N	N										18	W	W	N	N
		19	W	W	W	W	W	W	W					19	N	N										19	W	W	W	W	W	W						19	N	N
		20	N	N										20	N	N										20	W	W	W	W	W							20	W	W	N	N
		Bird:	Orange												Red-Blue												White												Yellow
	Experiment 5: High vs Low water level
			stone drops												stone drops												stone drops												stone drops
			1	2	3	4	5	6	7	8	9	10			1	2	3	4	5	6	7	8	9	10			1	2	3	4	5	6	7						1	2	3	4	5	6	7	8
	Trial number	1	N	N	N	N	N	W	W	W	W			1	N	N	N	N	N	N	W	W	W	W		1	N	N	N	N	N	N	W					1	N	W	W	N	N	W
		2	W	W	W	N	N	N	N	W	W	W		2	W	W	W	W								2	W											2	W	N	W	W	W	W
		3	W	W	W									3	N	N	N	W	W							3	W											3	W	W	W	W	W
		4	N	N	N	N	W	W						4	W	N	N	W	W	W						4	W	W	W	W								4	N	N	W	W	W	W	N	W
		5	W	W	W	W	W							5	N	N	W	W	W	W						5	W	W	W	W								5	W	W	W	W	W
		6	W	W	W									6	W	W	W	W								6	W	W	W									6	W	W	W	W	W
		7	W	W	W	W								7	W	W	W	W								7	W	W										7	W	W	W	W
		8	W	W	W	W	W							8	W	W	W	W	W							8	W	W	W	W								8	W	W
		9	W	W										9	W	W	W	W								9	W											9	W	W	W
		10	N	N	W	W	W	W						10	W	W										10	W	W	W									10	W	W	W	W	W
		11	W	W	W	W	W	W						11	W	W	W	W	N	W						11	W	W	W									11	W	W	W	W	W
		12	N	N	W	W	W	W						12	W	W	W									12	W	W	W									12	W	W	W	W	W	W
		13	W	W	W	W	W							13	N	W	W	W	W	W						13	W											13	W	W
		14	W	W	W	W	W	W	W					14	W	W	W	W	W							14	W	W										14	W	W
		15	W	W	W	W	W							15	W	W										15	W	W	W	W								15	W
		16	N	W	W	W	W							16	W	W	W	W								16	W	W	W									16	W	W
		17	W	W										17	W	W										17	W	W	W	W	W							17	W	W	W	W	W
		18	W	W	W	W	W							18	W	W	W	W	W							18	W											18	W	W	W	W
		19	W	W	W	W								19	W	W	W	W	W							19	W											19	W	W	W	W	W	W
		20	W	W	W	W								20	W	W	W									20	W	W	W	W								20	W	W	W
		Bird:	Orange												Red-Blue												White												Yellow
	Experiment 6: U-tube
			stone drops												stone drops												stone drops												stone drops
			1	2	3	4	5	6	7	8					1	2	3	4	5	6	7						1	2	3	4	5	6	7						1	2	3	4	5	6	7	8
	Trial number	1	B	R	B	R	B	B	R	R				1	R	B	R									1	B											1	R	R	B	R	R	R	R
		2	R	B	R	B	R	R						2	B	R	R									2	R	R	R	B	R							2	B	B	R	R	R	B	B	B
		3	R	B	B	B	B	B	R					3	R	R	R									3	B											3	R	R
		4	R	B	R	B	R	R						4	B	R	R									4	B	B										4	R	R	B	R
		5	R	R										5	B	B	B	R	R							5	B											5	R	B	B	R	R
		6	B	B	R									6	R	R	R									6	B	R	B									6	R	R	R	R
		7	R											7	R	B	R									7	R	R	R	R	R	R						7	R	R
		8	R	R	R									8	R	R										8	B	B										8	B	B	R	R	R	R
		9	B	R	R	R	R	R						9	B	B	R	B	B							9	R	B	R	R	R	B	R					9	R	B	R
		10	B	B	B	R	B	B	R	B				10	B	B	R									10	R											10	B	B	R	B	B	B	B	R
		11	R	R										11	R											11	R	R	B	B								11	R
		12	B	B	B	B	B	R	R	R				12	R	B										12	R	R	B	B								12	B	B	B	B	R	B	R
		13	R	R										13	R	R	R									13	B											13	B	B	B	B	B	R	R	R
		14	R											14	B	B	B	B	B	B						14	B	R	B	B								14	R
		15	B	B	B	B	B	B	R	R				15	B	B	B	R	R	R	R					15	R	R	B	B								15	R	R	R	R
		16	B	B	B	B	B	B	B	R				16	R	R	R	R	B	R						16	B	B										16	B	B	B	R	B	B	R	R
		17	R	R										17	B	B	B	B	B	B						17	R	R	R	B	R	R	B					17	R	R	R
		18	B	B	B	B	B	B	B					18	B	B	B	B	R							18	R	R	B	B								18	R	B	B	B	B	B	B	R
		19	B	B	B	R	B	B	B	B				19	R	R	R									19	R	R	R	B	R	R	B					19	B	B	R
		20	R	R										20	B	B	B	B	B	B						20	R	B	R	R	B							20	R	R	R
		Bird:	Orange												Red-Blue												White												Yellow
[truncated: 26 more columns]
